# Supplementary material
Source: MDPI journal article supplement (https://www.mdpi.com/1424-8247/14/5/425)
Supplement: s1 [file s1]

Table S1. 472 cephalosporin–AE combinations that satisfied all three criteria of the signal.

| Drug          | PT                                    | PRR       | ROR       | IC        |
|---------------|---------------------------------------|-----------|-----------|-----------|
| cefatrizine   | CORNEAL OEDEMA                        | 440.64024 | 481.67333 | 3.8397972 |
| cefatrizine   | CORNEAL ULCERATION                    | 346.21733 | 399.70171 | 4.4013435 |
| cefbuparazone | SKIN REACTION LOCALISED               | 222.94905 | 246.42111 | 4.2500092 |
| cefodizime    | VEIN PAIN                             | 105.50662 | 108.97476 | 4.3933428 |
| cefotiam      | APPLICATION SITE<br>REACTION          | 103.03606 | 108.88114 | 3.6552805 |
| cefoxitin     | APPLICATION SITE<br>REACTION          | 93.132743 | 97.87712  | 4.3789006 |
| cefazedone    | SKIN REACTION LOCALISED               | 89.550284 | 93.087837 | 2.4089007 |
| cefroxadine   | CRUSTING                              | 82.777778 | 83.343714 | 3.5575346 |
| cefmetazole   | ERYTHEMA INDURATUM                    | 80.503156 | 80.591822 | 2.4428785 |
| cefradine     | NEUROLOGIC DISORDER<br>NOS            | 60.28782  | 60.386908 | 2.4937999 |
| cefpiramide   | DRUG REACTION<br>PARADOXICAL          | 59.160868 | 59.496089 | 3.5429999 |
| cefotiam      | SKIN REACTION LOCALISED               | 57.688233 | 59.126688 | 3.5008826 |
| cefpodoxime   | INGROWING NAILS                       | 48.44581  | 48.477639 | 2.2549677 |
| cefaclor      | ANAPHYLACTOID<br>REACTION             | 43.186255 | 43.236737 | 2.2278987 |
| cefmetazole   | SKIN REACTION LOCALISED               | 42.415642 | 43.183178 | 3.8748356 |
| cefcapene     | PEPTIC ULCER                          | 40.997542 | 41.088514 | 2.483683  |
| cefetamet     | PALMAR-PLANTAR<br>ERYTHRODYSAESTHESIA | 40.897001 | 41.609447 | 3.100091  |
| cefdinir      | FAECES DISCOLOURED                    | 38.623731 | 38.684154 | 2.4256852 |
| cefotaxime    | APPLICATION SITE<br>REACTION          | 37.247243 | 37.971371 | 2.767364  |
| cefotetan     | APPLICATION SITE<br>REACTION          | 36.586014 | 37.284064 | 2.7604235 |
| cefoxitin     | INJECTION SITE REACTION               | 36.151527 | 37.521816 | 3.9324705 |
| cefuroxime    | CONCUSSION                            | 34.765074 | 34.797592 | 2.3079594 |
| cefradine     | NAIL DISORDER                         | 33.493233 | 33.674963 | 3.3439615 |
| cefazolin     | APPLICATION SITE<br>REACTION          | 28.289909 | 28.702005 | 2.6059576 |
| cefcapene     | MOUTH DRY                             | 28.159928 | 28.876882 | 3.9090795 |
| cefuroxime    | SOMNOLENCE                            | 28.131738 | 29.754847 | 3.6793096 |
| cefroxadine   | APPLICATION SITE OEDEMA               | 26.607143 | 26.673311 | 2.4100547 |
| cefroxadine   | SKIN ULCERATION                       | 26.607143 | 26.739822 | 2.9919594 |
| cefcapene     | SOMNOLENCE                            | 26.389222 | 27.808747 | 4.0143953 |
| cefuroxime    | APPLICATION SITE<br>REACTION          | 23.176716 | 23.450325 | 3.4014535 |
| cefradine     | ECZEMA                                | 22.966788 | 23.015767 | 2.5525458 |
| ceftriaxone   | SKIN REACTION LOCALISED               | 21.618557 | 21.811561 | 1.5467862 |

|                                                     |                              |           |           |           |
|-----------------------------------------------------|------------------------------|-----------|-----------|-----------|
| cefpiramide                                         | INJECTION SITE REACTION      | 21.534556 | 22.003986 | 3.6311834 |
| cefuroxime                                          | DRUG PRESCRIBING ERROR       | 21.393892 | 21.472683 | 3.0265081 |
| cefaclor                                            | ANAPHYLACTIC REACTION        | 20.556038 | 21.458039 | 2.2289806 |
| cefaclor                                            | SOMNOLENCE                   | 19.988121 | 20.781482 | 2.220876  |
| cefoperazone<br>and beta-<br>lactamase<br>inhibitor | SKIN REACTION LOCALISED      | 19.507356 | 19.663536 | 3.2364885 |
| flomoxef                                            | SKIN REACTION LOCALISED      | 19.384831 | 19.538995 | 2.9473889 |
| cefditoren                                          | PULMONARY DISORDERS          | 19.270667 | 19.319519 | 2.8173578 |
| cefetamet                                           | MOUTH DRY                    | 19.209197 | 19.534361 | 2.819901  |
| cefminox                                            | SKIN REACTION LOCALISED      | 18.559945 | 18.700875 | 3.1287713 |
| cefoxitin                                           | SKIN REACTION LOCALISED      | 17.492674 | 17.61737  | 3.1527719 |
| cefadroxil                                          | HYPERCHOLESTEROLAEMIA        | 17.384767 | 17.576178 | 3.264933  |
| cefroxadine                                         | EYE PAIN                     | 17.24537  | 17.315454 | 2.6693317 |
| cefuroxime                                          | MOUTH DRY                    | 17.206956 | 17.465718 | 3.2352149 |
| cefcapene                                           | DRUG PRESCRIBING ERROR       | 16.819504 | 16.867515 | 2.4821347 |
| ceftriaxone                                         | APPLICATION SITE<br>REACTION | 16.813169 | 16.954222 | 1.5086422 |
| cefdinir                                            | ECZEMA                       | 16.553027 | 16.578006 | 2.217833  |
| cefotiam                                            | INJECTION SITE RASH          | 16.440262 | 16.759349 | 2.9499378 |
| cefradine                                           | OVARIAN<br>HYPERSTIMULATION  | 15.458415 | 15.498734 | 2.5533425 |
| cefaclor                                            | TONGUE PARALYSIS             | 14.395418 | 14.400757 | 1.7899575 |
| cefditoren                                          | CRUSTING                     | 14.274568 | 14.290319 | 2.2497194 |
| cefotaxime                                          | SKIN REACTION LOCALISED      | 13.814445 | 13.890837 | 2.3841158 |
| cefazolin                                           | SKIN REACTION LOCALISED      | 13.699932 | 13.77501  | 2.3173251 |
| cefotiam                                            | ALLERGY                      | 13.676716 | 14.774211 | 2.8588984 |
| cefradine                                           | FLATULENCE                   | 13.397293 | 13.438802 | 2.5858873 |
| cefaclor                                            | ANAPHYLACTIC SHOCK           | 13.329091 | 13.411505 | 2.0688298 |
| cefazolin                                           | ANAPHYLACTOID<br>REACTION    | 13.271809 | 13.276318 | 1.8073019 |
| cefuroxime                                          | THIRST                       | 13.243838 | 13.259565 | 2.2363777 |
| cefaclor                                            | APATHY                       | 13.024426 | 13.039616 | 1.9681157 |
| ceftezole                                           | APPLICATION SITE<br>REACTION | 13.00969  | 13.092414 | 2.9099267 |
| flomoxef                                            | HEPATIC ENZYMES<br>INCREASED | 12.94738  | 14.920138 | 2.7888059 |
| cefprozil                                           | SOMNOLENCE                   | 12.794579 | 13.105352 | 3.1887028 |
| cefbuperazone                                       | ALLERGY                      | 12.650497 | 13.577442 | 3.0127377 |
| cefixime                                            | OESOPHAGITIS                 | 12.473103 | 12.486982 | 2.0723825 |
| cefixime                                            | BURN                         | 12.473103 | 12.486982 | 2.0723825 |
| cefodizime                                          | INJECTION SITE REACTION      | 12.379443 | 12.527549 | 2.6717469 |
| cefetamet                                           | SOMNOLENCE                   | 12.240895 | 12.523939 | 2.7731884 |

|                                                     |                              |           |           |           |
|-----------------------------------------------------|------------------------------|-----------|-----------|-----------|
| ceftizoxime                                         | INJECTION SITE URTICARIA     | 12.042661 | 12.055558 | 2.1723667 |
| cefoperazone<br>and beta-<br>lactamase<br>inhibitor | APPLICATION SITE<br>REACTION | 11.935422 | 12.004488 | 2.8102006 |
| cefprozil                                           | BRONCHITIS                   | 11.87812  | 12.09514  | 3.0364655 |
| cefroxadine                                         | PERIODONTAL<br>DESTRUCTION   | 11.640625 | 11.695758 | 2.559821  |
| cefbuperazone                                       | FLUSHING                     | 11.615833 | 11.748871 | 2.8496749 |
| cefozopran                                          | GRANULOCYTOPENIA             | 11.553157 | 14.191447 | 2.2028319 |
| cefaclor                                            | LARYNX OEDEMA                | 11.036487 | 11.051839 | 1.9243806 |
| cefotiam                                            | INJECTION SITE REACTION      | 11.019035 | 11.134939 | 2.6426298 |
| cefcapene                                           | TASTE PERVERSION             | 10.932678 | 10.955269 | 2.087738  |
| ceftezole                                           | MALaise                      | 10.847482 | 11.037322 | 2.9257138 |
| cefadroxil                                          | FACE OEDEMA                  | 10.830864 | 11.000229 | 2.9638607 |
| cefditoren                                          | FIXED ERUPTION               | 10.705926 | 10.720326 | 2.2338004 |
| cefpodoxime                                         | OTITIS MEDIA                 | 10.62946  | 10.742671 | 2.6893752 |
| cefodizime                                          | INJECTION SITE RASH          | 10.432115 | 10.554876 | 2.5499072 |
| cefuroxime                                          | FLATULENCE                   | 10.300763 | 10.324687 | 2.431731  |
| cefroxadine                                         | SKIN EXFOLIATION             | 9.897343  | 9.9822266 | 2.70131   |
| flomoxef                                            | VEIN PAIN                    | 9.8798897 | 9.906679  | 2.3941897 |
| cefroxadine                                         | APPLICATION SITE<br>REACTION | 9.8026316 | 9.8482411 | 2.440426  |
| cefmenoxime                                         | HEPATIC ENZYMES<br>INCREASED | 9.7884685 | 10.843085 | 2.1157737 |
| cefaclor                                            | FLATULENCE                   | 9.5969456 | 9.6175453 | 1.8951601 |
| cefaclor                                            | EYELID SKIN DISORDER         | 9.5969456 | 9.600372  | 1.6633156 |
| cefpodoxime                                         | CRYING ABNORMAL              | 9.2277733 | 9.2351344 | 1.9790552 |
| cefotiam                                            | INJECTION SITE PAIN          | 9.1678155 | 9.3079954 | 2.5153865 |
| cefaclor                                            | ANGIOEDEMA                   | 9.136818  | 9.3685365 | 1.9218607 |
| cefixime                                            | TOOTH CARIES                 | 8.9550482 | 8.9678841 | 2.0794634 |
| cefradine                                           | ANAPHYLACTIC REACTION        | 8.8162833 | 8.9669373 | 2.7613456 |
| cefcapene                                           | GASTRIC ULCER                | 8.7461422 | 8.769651  | 2.139958  |
| cefprozil                                           | FACE OEDEMA                  | 8.5998118 | 8.7034027 | 2.6067785 |
| cefixime                                            | RASH PUSTULAR                | 8.5599725 | 8.5752267 | 2.1598327 |
| cefalexin                                           | LACERATION                   | 8.5436453 | 8.5695982 | 2.2916899 |
| cefalexin                                           | GASTRIC ULCER                | 8.2588571 | 8.2796562 | 2.1852407 |
| cefepime                                            | APHASIA                      | 8.1775489 | 8.183239  | 1.8886397 |
| ceftizoxime                                         | SKIN REACTION LOCALISED      | 8.1579319 | 8.1830695 | 2.3522909 |
| cefdinir                                            | URINARY INCONTINENCE         | 8.1313117 | 8.1465904 | 2.058279  |
| cefpodoxime                                         | OTITIS MEDIA CHRONIC         | 8.0743017 | 8.0822148 | 2.0003077 |
| cefpodoxime                                         | FLATULENCE                   | 8.0743017 | 8.088558  | 2.1951832 |
| cefminox                                            | ALLERGY                      | 8.0632158 | 8.4113609 | 2.7737848 |

|                                                     |                                       |           |           |           |
|-----------------------------------------------------|---------------------------------------|-----------|-----------|-----------|
| cefradine                                           | OEDEMA PERIORBITAL                    | 8.038376  | 8.1015713 | 2.5433084 |
| cefoperazone<br>and beta-<br>lactamase<br>inhibitor | VEIN PAIN                             | 8.0172277 | 8.0343967 | 2.2225234 |
| cefamandole                                         | SWEATING INCREASED                    | 7.9804974 | 8.1632329 | 2.2724783 |
| cefotetan                                           | SKIN REACTION LOCALISED               | 7.9417222 | 7.9654522 | 2.0402992 |
| cefaclor                                            | FACE OEDEMA                           | 7.9408355 | 8.0281034 | 1.8437256 |
| cefepime                                            | ENCEPHALOPATHY                        | 7.8368177 | 7.8546583 | 2.0637125 |
| cefradine                                           | PALMAR-PLANTAR<br>ERYTHRODYSAESTHESIA | 7.7790735 | 7.8017713 | 2.2168326 |
| cefradine                                           | VAGINAL HAEMORRHAGE                   | 7.7292077 | 7.7668431 | 2.3886065 |
| cefprozil                                           | GASTROENTERITIS                       | 7.6820453 | 7.7148809 | 2.086354  |
| cefoperazone                                        | HYPOTENSION                           | 7.6755178 | 8.0800946 | 2.1349993 |
| cefcapene                                           | OEDEMA PERIORBITAL                    | 7.516216  | 7.5708905 | 2.4294429 |
| cefazolin                                           | HYPOTONIA                             | 7.4653926 | 7.4707403 | 1.8009703 |
| cefazedone                                          | ALLERGY                               | 7.4359792 | 7.7274133 | 1.7885774 |
| cefuroxime                                          | VEIN PAIN                             | 7.3744096 | 7.3887525 | 2.1417792 |
| cefaclor                                            | OEDEMA GENERALISED                    | 7.309823  | 7.3788638 | 1.7965952 |
| cefaclor                                            | FIXED ERUPTION                        | 7.1977092 | 7.2038883 | 1.6877155 |
| cefroxadine                                         | FACE OEDEMA                           | 7.1423304 | 7.2117051 | 2.4344849 |
| cefradine                                           | ANGIOEDEMA                            | 6.9739335 | 7.1029161 | 2.5142319 |
| cefmetazole                                         | FLUSHING                              | 6.9699702 | 7.0146389 | 2.3630091 |
| cefadroxil                                          | SOMNOLENCE                            | 6.9059489 | 6.9889364 | 2.453169  |
| cefadroxil                                          | ANGIOEDEMA                            | 6.8586479 | 6.9830059 | 2.5051933 |
| cefaclor                                            | DRUG REACTION<br>PARADOXICAL          | 6.8549611 | 6.8588514 | 1.6133492 |
| cefaclor                                            | CRYING ABNORMAL                       | 6.8549611 | 6.8588514 | 1.6133492 |
| cefpodoxime                                         | ASTHMA                                | 6.8509226 | 6.8692846 | 2.1616542 |
| cefbuperazone                                       | VERTIGO                               | 6.7759025 | 6.7824087 | 1.8477686 |
| cefuroxime                                          | LARYNGITIS                            | 6.728724  | 6.7453076 | 2.1405848 |
| cefprozil                                           | OTITIS MEDIA                          | 6.7096345 | 6.7518239 | 2.1630104 |
| cefradine                                           | ANAPHYLACTIC SHOCK                    | 6.6986466 | 6.7177269 | 2.0967306 |
| cefazedone                                          | FLUSHING                              | 6.6963577 | 6.737294  | 1.7166997 |
| cefepime                                            | APPLICATION SITE<br>REACTION          | 6.6711583 | 6.6911227 | 1.973975  |
| cefpodoxime                                         | GASTROENTERITIS                       | 6.6700753 | 6.694252  | 2.1842914 |
| cefalexin                                           | PALMAR-PLANTAR<br>ERYTHRODYSAESTHESIA | 6.6603687 | 6.6765875 | 2.025213  |
| cefpodoxime                                         | BRONCHITIS                            | 6.6494249 | 6.7119694 | 2.2652442 |
| cefazolin                                           | TACHYCARDIA<br>SUPRAVENTRICULAR       | 6.6359045 | 6.6395295 | 1.68443   |
| cefodizime                                          | TEMPERATURE CHANGED<br>SENSATION      | 6.5848102 | 6.6574976 | 2.1705065 |

|                                           |                                  |           |           |           |
|-------------------------------------------|----------------------------------|-----------|-----------|-----------|
| cefcapene                                 | CATARACT                         | 6.5075463 | 6.5284557 | 2.0325109 |
| cefalexin                                 | ARTHRITIS                        | 6.352967  | 6.3652304 | 1.8957341 |
| cefprozil                                 | CONJUNCTIVITIS                   | 6.3102515 | 6.356086  | 2.1625236 |
| cefcapene                                 | FACE OEDEMA                      | 6.2887084 | 6.3412319 | 2.2883354 |
| cefpiramide                               | SWEATING INCREASED               | 6.2746375 | 6.3825979 | 2.3902248 |
| cefalexin                                 | FACE OEDEMA                      | 6.2124147 | 6.2635463 | 2.291864  |
| cefbuperazone                             | ANAPHYLACTIC SHOCK               | 6.2112439 | 6.2274188 | 2.0886236 |
| cefpodoxime                               | NERVOUSNESS                      | 6.2110013 | 6.2285271 | 2.0867171 |
| cefpodoxime                               | CREATINE PHOSPHOKINASE INCREASED | 6.2110013 | 6.2168301 | 1.8274909 |
| cefoperazone and beta-lactamase inhibitor | MALAISE                          | 6.1992622 | 6.2560748 | 2.2783831 |
| cefdroxil                                 | ANAPHYLACTIC SHOCK               | 6.1812505 | 6.1972544 | 1.8993079 |
| ceftezole                                 | HEPATIC ENZYMES INCREASED        | 6.1763857 | 6.5517128 | 2.379523  |
| cefditoren                                | SKIN ULCERATION                  | 6.117672  | 6.1237445 | 1.7879257 |
| cefuroxime                                | OEDEMA PERIORBITAL               | 6.0838879 | 6.1183605 | 2.2005045 |
| cefminox                                  | INJECTION SITE PAIN              | 6.056403  | 6.1133994 | 2.2676029 |
| cefodizime                                | SWEATING INCREASED               | 6.0289496 | 6.1277718 | 2.2186514 |
| cefditoren                                | SPUTUM DISORDER                  | 6.001807  | 6.0572494 | 2.221506  |
| flomoxef                                  | INJECTION SITE REACTION          | 5.9666785 | 5.9976263 | 2.0658088 |
| cefdroxil                                 | DIABETES MELLITUS                | 5.9182186 | 5.9372225 | 1.9553494 |
| cefaclor                                  | DRUG PRESCRIBING ERROR           | 5.9058126 | 5.9110302 | 1.5846171 |
| cefprome                                  | ALLERGY                          | 5.8186722 | 5.9877485 | 2.3063826 |
| cefzopran                                 | NAUSEA                           | 5.7939467 | 8.9899111 | 2.0807039 |
| cefotiam                                  | ALLERGIC REACTION                | 5.7804774 | 5.8093298 | 2.0487628 |
| cefaclor                                  | OEDEMA PHARYNX                   | 5.7581673 | 5.7600638 | 1.439179  |
| cefmetazole                               | DIZZINESS                        | 5.7548966 | 6.2716907 | 2.2866223 |
| cefdroxil                                 | DYSPEPSIA                        | 5.7267468 | 6.024586  | 2.3627153 |
| cefroxadine                               | MOUTH DRY                        | 5.6439394 | 5.6680013 | 1.9855591 |
| cefditoren                                | GASTROESOPHAGEAL REFLUX          | 5.6346979 | 5.6484711 | 1.9908377 |
| cefaclor                                  | PARALYSIS                        | 5.5982182 | 5.604639  | 1.5730857 |
| cefdroxil                                 | OEDEMA PERIORBITAL               | 5.5631255 | 5.591402  | 2.0490883 |
| cefdroxil                                 | SKIN DISORDER                    | 5.5631255 | 5.5843001 | 1.9645414 |
| cefaclor                                  | OEDEMA PERIORBITAL               | 5.5182437 | 5.5460148 | 1.6166742 |
| cefpodoxime                               | INJECTION SITE INFLAMMATION      | 5.5052057 | 5.5203577 | 1.9758127 |
| flomoxef                                  | MALAISE                          | 5.4796027 | 5.5228143 | 2.0072214 |
| cefprozil                                 | SINUSITIS                        | 5.4645477 | 5.4975369 | 1.9754808 |
| cefprome                                  | TEMPERATURE CHANGED SENSATION    | 5.4292132 | 5.4766352 | 1.9259547 |

|                                                     |                                        |           |           |           |
|-----------------------------------------------------|----------------------------------------|-----------|-----------|-----------|
| cefaclor                                            | HYPOTONIA                              | 5.3982819 | 5.4009119 | 1.4689593 |
| cefadroxil                                          | ANAPHYLACTIC REACTION                  | 5.3836698 | 5.4348809 | 2.1460683 |
| cefepime                                            | STUPOR                                 | 5.3577045 | 5.3859948 | 1.8284176 |
| cefditoren                                          | INJECTION SITE<br>INFLAMMATION         | 5.352963  | 5.3671968 | 1.9608635 |
| ceftizoxime                                         | INJECTION SITE PRURITUS                | 5.2686643 | 5.2773963 | 1.8464775 |
| cefmetazole                                         | NAUSEA                                 | 5.2281064 | 7.6160897 | 2.1796478 |
| cefoperazone                                        | HEPATIC ENZYMES<br>INCREASED           | 5.2205165 | 5.4763054 | 1.8258497 |
| cefepime                                            | DYSKINESIA                             | 5.2038948 | 5.2072274 | 1.6074654 |
| flomoxef                                            | INJECTION SITE PAIN                    | 5.1912025 | 5.2316321 | 1.9541731 |
| cefprozil                                           | INSOMNIA                               | 5.1249004 | 5.2335866 | 2.1671958 |
| flomoxef                                            | VASCULITIS                             | 5.1142958 | 5.1186681 | 1.68372   |
| cefroxadine                                         | BULLOUS ERUPTION                       | 5.1127451 | 5.1376277 | 1.9372237 |
| cefpodoxime                                         | GASTROESOPHAGEAL<br>REFLUX             | 5.099559  | 5.1105817 | 1.8716794 |
| ceftriaxone                                         | VEIN PAIN                              | 5.0770854 | 5.0833969 | 1.1495281 |
| cefradine                                           | FACE OEDEMA                            | 4.9795249 | 5.0107544 | 2.0167598 |
| cefaclor                                            | SYNCOPE                                | 4.9549447 | 4.9800513 | 1.5440115 |
| cefotetan                                           | VEIN PAIN                              | 4.9370332 | 4.9429594 | 1.635227  |
| cefditoren                                          | MOUTH DRY                              | 4.86633   | 4.8835904 | 1.9135987 |
| ceftazidime                                         | APPLICATION SITE<br>REACTION           | 4.8411978 | 4.8510013 | 1.8166595 |
| cefotetan                                           | ANAPHYLACTIC SHOCK                     | 4.8273213 | 4.8365475 | 1.6548125 |
| cefalexin                                           | DYSPEPSIA                              | 4.802945  | 5.0018964 | 2.111887  |
| cefaclor                                            | TASTE PERVERSION                       | 4.7984728 | 4.8022599 | 1.4498871 |
| cefaclor                                            | RESPIRATORY DEPRESSION                 | 4.7984728 | 4.8009967 | 1.4107628 |
| cefcapene                                           | MEDICAL DEVICE<br>COMPLICATION         | 4.7950341 | 4.809442  | 1.7689358 |
| cefadroxil                                          | DERMATITIS                             | 4.7683933 | 4.78588   | 1.8191548 |
| flomoxef                                            | ALLERGY                                | 4.7680786 | 4.875738  | 1.8922842 |
| cefixime                                            | CHRONIC OBSTRUCTIVE<br>AIRWAYS DISEASE | 4.6941785 | 4.7016324 | 1.6974162 |
| cefixime                                            | PALMAR-PLANTAR<br>ERYTHRODYSAESTHESIA  | 4.6941785 | 4.7016324 | 1.6974162 |
| ceftezole                                           | SKIN REACTION LOCALISED                | 4.6904005 | 4.6978408 | 1.6966242 |
| cefoperazone<br>and beta-<br>lactamase<br>inhibitor | HEPATIC ENZYMES<br>INCREASED           | 4.6826286 | 4.8815798 | 2.02245   |
| cefaclor                                            | DYSPEPSIA                              | 4.6509262 | 4.8355736 | 1.5111263 |
| cefprome                                            | COLITIS<br>PSEUDOMEMBRANOUS            | 4.604626  | 4.6986597 | 1.9807242 |
| cefazedone                                          | APPLICATION SITE PAIN                  | 4.6037459 | 4.606733  | 1.3931883 |
| cefradine                                           | DERMATITIS                             | 4.5933577 | 4.6094174 | 1.8282946 |

|             |                                      |           |           |           |
|-------------|--------------------------------------|-----------|-----------|-----------|
| cefminox    | DIZZINESS                            | 4.5336924 | 4.8294371 | 2.0720885 |
| cefditoren  | BRONCHITIS                           | 4.4982882 | 4.5243948 | 1.8805755 |
| ceftizoxime | COLITIS<br>PSEUDOMEMBRANOUS          | 4.4895887 | 4.5782893 | 1.9307781 |
| cefpiramide | VOMITING                             | 4.4859099 | 5.0579805 | 2.0422715 |
| cefazedone  | INJECTION SITE REACTION              | 4.4809794 | 4.4972436 | 1.4495534 |
| cefaclor    | ALLERGIC REACTION                    | 4.4785746 | 4.4948188 | 1.4667535 |
| ceftriaxone | INJECTION SITE REACTION              | 4.4678352 | 4.4839902 | 1.1027906 |
| cefroxadine | CONJUNCTIVITIS                       | 4.4345238 | 4.4553031 | 1.7928801 |
| cefditoren  | ERYTHEMA MULTIFORME                  | 4.4300383 | 4.436147  | 1.6566237 |
| cefixime    | CYSTITIS                             | 4.4096828 | 4.4165627 | 1.6419765 |
| cefpiramide | PARAESTHESIA                         | 4.3701747 | 4.4112267 | 1.9185622 |
| cefradine   | ACNE                                 | 4.3581556 | 4.3750497 | 1.7972046 |
| cefaclor    | DYSPTNOEA                            | 4.3376294 | 4.5530288 | 1.4596174 |
| cefotetan   | ALLERGY                              | 4.3342695 | 4.4206424 | 1.6196871 |
| cefuroxime  | FACE OEDEMA                          | 4.3071773 | 4.3296024 | 1.8311137 |
| cefotaxime  | VEIN PAIN                            | 4.2890765 | 4.2933768 | 1.5105819 |
| ceftezole   | POST-OPERATIVE PAIN                  | 4.2765416 | 4.2831475 | 1.6142252 |
| cefuroxime  | ANGIOEDEMA                           | 4.2331901 | 4.2752069 | 1.852777  |
| cefpodoxime | SINUSITIS                            | 4.1620112 | 4.1797753 | 1.7437173 |
| cefadroxil  | OEDEMA GENERALISED                   | 4.1593462 | 4.1789238 | 1.7479373 |
| cefotetan   | INJECTION SITE REACTION              | 4.1514963 | 4.1651337 | 1.5535983 |
| cefditoren  | LARYNGITIS                           | 4.1442294 | 4.1498291 | 1.5954911 |
| cefaclor    | DERMATITIS                           | 4.1129767 | 4.1254286 | 1.4003472 |
| cefepime    | TENESMUS                             | 4.0887745 | 4.093325  | 1.5071117 |
| cefcapene   | OEDEMA GENERALISED                   | 4.0869823 | 4.1057768 | 1.7279473 |
| cefradine   | DYSPEPSIA                            | 4.0836669 | 4.2197637 | 1.8995584 |
| cefoxitin   | ALLERGY                              | 4.0675552 | 4.1420105 | 1.8499662 |
| cefixime    | EATING DISORDER                      | 4.0422092 | 4.0483477 | 1.5626177 |
| cefuroxime  | ANAPHYLACTIC REACTION                | 4.0372344 | 4.0637647 | 1.7763363 |
| cefmetazole | INJECTION SITE PAIN                  | 4.0352459 | 4.0579563 | 1.7733596 |
| cefprozil   | UPPER RESPIRATORY TRACT<br>INFECTION | 4.0156146 | 4.0605121 | 1.8001939 |
| cefroxadine | RASH ERYTHEMATOUS                    | 3.9677318 | 4.0117174 | 1.8113627 |
| cefradine   | OEDEMA                               | 3.9651182 | 4.0018483 | 1.8030519 |
| cefepime    | SKIN REACTION LOCALISED              | 3.9568785 | 3.9619061 | 1.4915598 |
| cefalexin   | MALAISE                              | 3.9327891 | 3.9530385 | 1.7320296 |
| cefazedone  | INJECTION SITE RASH                  | 3.9312887 | 3.9455501 | 1.3531644 |
| cefmetazole | INJECTION SITE RASH                  | 3.9196293 | 3.9337917 | 1.6967331 |
| ceftizoxime | PARAESTHESIA                         | 3.9184036 | 3.9502376 | 1.7445526 |
| ceftriaxone | INJECTION SITE PAIN                  | 3.9135549 | 3.9346926 | 1.0385021 |
| cefuroxime  | OEDEMA GENERALISED                   | 3.8988868 | 3.915719  | 1.7060375 |

|                                                     |                                      |           |           |           |
|-----------------------------------------------------|--------------------------------------|-----------|-----------|-----------|
| cefditoren                                          | CYSTITIS                             | 3.893064  | 3.8982164 | 1.5368439 |
| cefodizime                                          | PARAESTHESIA                         | 3.8880161 | 3.9192717 | 1.6035616 |
| cefminox                                            | INJECTION SITE RASH                  | 3.8788199 | 3.8926382 | 1.6143777 |
| cefprome                                            | PARAESTHESIA                         | 3.8468295 | 3.8773095 | 1.5924976 |
| cefcapene                                           | DYSPEPSIA                            | 3.8001286 | 3.9147796 | 1.8197087 |
| cefalexin                                           | ANGIOEDEMA                           | 3.7711676 | 3.8032043 | 1.7367588 |
| cefpodoxime                                         | ENTERITIS                            | 3.7680074 | 3.7723441 | 1.4967611 |
| cefaclor                                            | OEDEMA MOUTH                         | 3.7553265 | 3.7586237 | 1.2890024 |
| cefalexin                                           | FLUSHING                             | 3.754026  | 3.7650863 | 1.5930156 |
| cefamandole                                         | CHEST PAIN                           | 3.731771  | 3.8032834 | 1.5721038 |
| cefoperazone<br>and beta-<br>lactamase<br>inhibitor | GRANULOCYTOPENIA                     | 3.7060338 | 3.8915443 | 1.7388628 |
| ceftizoxime                                         | MALaise                              | 3.6797021 | 3.6970057 | 1.6429506 |
| cefminox                                            | NAUSEA                               | 3.6788794 | 4.5908991 | 1.8090344 |
| cefazedone                                          | DIZZINESS                            | 3.676265  | 3.8550586 | 1.3139087 |
| cefuroxime                                          | DYSPEPSIA                            | 3.6562199 | 3.7606979 | 1.7060673 |
| cefazedone                                          | NAUSEA                               | 3.6394416 | 4.5251693 | 1.3066368 |
| cefpodoxime                                         | UPPER RESPIRATORY TRACT<br>INFECTION | 3.6089682 | 3.6438253 | 1.6216486 |
| cefaclor                                            | BRONCHOSPASM                         | 3.5988546 | 3.600927  | 1.2300299 |
| cefditoren                                          | PHARYNGITIS                          | 3.5910863 | 3.6539958 | 1.6668368 |
| cefpodoxime                                         | MUSCLE WEAKNESS                      | 3.5885785 | 3.5920539 | 1.4228388 |
| cefprozil                                           | OEDEMA                               | 3.5654336 | 3.5939736 | 1.6171871 |
| cefdinir                                            | PHARYNGITIS                          | 3.562776  | 3.6244958 | 1.7050432 |
| cefazedone                                          | VOMITING                             | 3.5394718 | 3.8572926 | 1.2837338 |
| cefoxitin                                           | INJECTION SITE RASH                  | 3.5274997 | 3.538528  | 1.565587  |
| cefditoren                                          | OTITIS MEDIA                         | 3.5234693 | 3.5332269 | 1.5516955 |
| cefpiramide                                         | NAUSEA                               | 3.5195321 | 4.3282237 | 1.7281884 |
| cefprozil                                           | PHARYNGITIS                          | 3.5189243 | 3.5788236 | 1.6880842 |
| ceftizoxime                                         | ANAPHYLACTIC SHOCK                   | 3.5124429 | 3.5168468 | 1.4358226 |
| cefprozil                                           | RHINITIS                             | 3.5121277 | 3.5526963 | 1.6486946 |
| cefoxitin                                           | SWEATING INCREASED                   | 3.4594763 | 3.4869784 | 1.6206988 |
| cefditoren                                          | EPISTAXIS                            | 3.4258963 | 3.4345525 | 1.512308  |
| cefpodoxime                                         | MOUTH DRY                            | 3.4254613 | 3.4330732 | 1.4891839 |
| cefditoren                                          | UPPER RESPIRATORY TRACT<br>INFECTION | 3.406431  | 3.436755  | 1.586305  |
| cefroxadine                                         | DYSPEPSIA                            | 3.4029635 | 3.4906941 | 1.6737936 |
| cefotiam                                            | SKIN DISCOLOURATION                  | 3.3869985 | 3.3955315 | 1.471855  |
| cefradine                                           | OEDEMA GENERALISED                   | 3.3806254 | 3.3926017 | 1.5184448 |
| cefadroxil                                          | ARTHRALGIA                           | 3.3602771 | 3.3767442 | 1.5298492 |



|                                                     |                                  |           |           |           |
|-----------------------------------------------------|----------------------------------|-----------|-----------|-----------|
| cefixime                                            | FACE OEDEMA                      | 3.348237  | 3.3605962 | 1.5266835 |
| cefotiam                                            | FLUSHING                         | 3.3430115 | 3.3513873 | 1.4578173 |
| cefazolin                                           | ALLERGY                          | 3.3415956 | 3.3880854 | 1.3493809 |
| cefepime                                            | CONVULSIONS GRAND MAL            | 3.331594  | 3.3344999 | 1.3092695 |
| cefradine                                           | SOMNOLENCE                       | 3.3262245 | 3.3418543 | 1.5356895 |
| cefixime                                            | OTITIS MEDIA                     | 3.3156349 | 3.3240588 | 1.4725783 |
| cefditoren                                          | GASTROENTERITIS                  | 3.2583253 | 3.263019  | 1.388446  |
| cefmenoxime                                         | RASH                             | 3.2473138 | 4.3118309 | 1.5369023 |
| cefpodoxime                                         | EPISTAXIS                        | 3.2297207 | 3.2372197 | 1.4310758 |
| cefaclor                                            | BRONCHITIS                       | 3.1855408 | 3.1970659 | 1.1982277 |
| cefadroxil                                          | TEMPERATURE CHANGED<br>SENSATION | 3.1563833 | 3.1697458 | 1.4408136 |
| cefpodoxime                                         | PHARYNGITIS                      | 3.1484698 | 3.1940672 | 1.4705552 |
| cefaletin                                           | OEDEMA                           | 3.1479949 | 3.1690658 | 1.5029548 |
| cefditoren                                          | RHINITIS                         | 3.1430241 | 3.1739424 | 1.4928763 |
| cefpodoxime                                         | EATING DISORDER                  | 3.1400062 | 3.1433589 | 1.3183293 |
| cefroxadine                                         | PARAESTHESIA                     | 3.1197655 | 3.1381343 | 1.4613614 |
| cefditoren                                          | COUGHING                         | 3.1186001 | 3.171356  | 1.4945074 |
| ceftezole                                           | INJECTION SITE REACTION          | 3.1019182 | 3.1087068 | 1.3829165 |
| cefixime                                            | MOUTH DRY                        | 3.086778  | 3.0926776 | 1.3584863 |
| cefroxadine                                         | OEDEMA                           | 3.0624066 | 3.0820826 | 1.4499545 |
| flomoxef                                            | PARAESTHESIA                     | 3.0197475 | 3.0366839 | 1.3725778 |
| cefmetazole                                         | OEDEMA PERIORBITAL               | 3.0188684 | 3.025638  | 1.3613836 |
| cefaclor                                            | OEDEMA                           | 3.0124941 | 3.0313781 | 1.1547967 |
| cefoxitin                                           | SKIN DISCOLOURATION              | 3.004282  | 3.0106347 | 1.346088  |
| cefpodoxime                                         | DERMATITIS                       | 2.9990263 | 3.0048505 | 1.3380358 |
| cefbuperazone                                       | RASH ERYTHEMATOUS                | 2.9803782 | 3.0023448 | 1.4161925 |
| cefamandole                                         | URTICARIA                        | 2.9692145 | 3.2310176 | 1.5036664 |
| cefuroxime                                          | PALPITATION                      | 2.9479156 | 2.9662029 | 1.4062533 |
| cefoperazone<br>and beta-<br>lactamase<br>inhibitor | FLUSHING                         | 2.9451041 | 2.9512272 | 1.328466  |
| cefroxadine                                         | CONSTIPATION                     | 2.9439795 | 3.002471  | 1.4756877 |
| cefodizime                                          | ALLERGY                          | 2.9404853 | 2.9743064 | 1.3850104 |
| cefodizime                                          | VOMITING                         | 2.9299651 | 3.1256927 | 1.5020432 |
| ceftezole                                           | ANGIOEDEMA                       | 2.921327  | 2.9384887 | 1.4023822 |
| cefdinir                                            | BRONCHITIS                       | 2.9211225 | 2.9304083 | 1.3486021 |
| cefamandole                                         | DYSPNOEA                         | 2.920388  | 3.0021066 | 1.3854297 |
| cefpodoxime                                         | RHINITIS                         | 2.9136624 | 2.9392299 | 1.3706838 |
| cefradine                                           | OEDEMA PERIPHERAL                | 2.8896123 | 2.9012439 | 1.359623  |
| cefditoren                                          | HAEMOPTYSIS                      | 2.8723216 | 2.8784439 | 1.3064584 |

|               |                                   |           |           |           |
|---------------|-----------------------------------|-----------|-----------|-----------|
| cefixime      | UPPER RESPIRATORY TRACT INFECTION | 2.8662938 | 2.886043  | 1.3868881 |
| cefdinir      | DYSPEPSIA                         | 2.8399802 | 2.8957065 | 1.4182899 |
| cefditoren    | GASTRITIS                         | 2.8339216 | 2.8388251 | 1.2713138 |
| cefprozil     | ANGIOEDEMA                        | 2.8237655 | 2.839507  | 1.3077812 |
| cefdinir      | ANGIOEDEMA                        | 2.8218251 | 2.8375389 | 1.3593983 |
| cefodizime    | CHEST PAIN                        | 2.8192052 | 2.8549538 | 1.3488761 |
| cefaclor      | STUPOR                            | 2.8128978 | 2.819058  | 1.0836535 |
| cefazolin     | HYPERLIPAEemia                    | 2.8074981 | 2.8093257 | 1.1052291 |
| cefazolin     | INJECTION SITE PAIN               | 2.7940651 | 2.8033384 | 1.1618825 |
| cefazolin     | NAUSEA                            | 2.793225  | 3.2216405 | 1.1771729 |
| cefprome      | AGranulocytosis                   | 2.7837057 | 2.8183782 | 1.333163  |
| cefmetazole   | SOMNOLENCE                        | 2.7759709 | 2.7859185 | 1.3107359 |
| cefotetan     | VOMITING                          | 2.7707676 | 2.9396621 | 1.1884177 |
| ceftezole     | SWEATING INCREASED                | 2.7695698 | 2.7853759 | 1.3363031 |
| ceftezole     | VOMITING                          | 2.7659112 | 2.9340191 | 1.3800898 |
| cefamandole   | VOMITING                          | 2.7599659 | 2.9271135 | 1.3875316 |
| cefotetan     | URTICARIA                         | 2.7483279 | 2.961366  | 1.1801427 |
| cefminox      | SWEATING INCREASED                | 2.7398013 | 2.7551731 | 1.3112354 |
| ceftizoxime   | SWEATING INCREASED                | 2.7369685 | 2.7522992 | 1.3073957 |
| cefotetan     | NAUSEA                            | 2.7315149 | 3.1339243 | 1.1740811 |
| flomoxef      | INJECTION SITE RASH               | 2.7295399 | 2.7353736 | 1.2263615 |
| cefotiam      | SWEATING INCREASED                | 2.6978689 | 2.7126386 | 1.2507688 |
| cefpodoxime   | SKIN DISORDER                     | 2.6914339 | 2.6952221 | 1.196351  |
| cefpodoxime   | PARONYCHIA                        | 2.6914339 | 2.6956019 | 1.2044754 |
| cefaclor      | INSOMNIA                          | 2.6908563 | 2.7139595 | 1.0550668 |
| cefotaxime    | ALLERGY                           | 2.6895872 | 2.7164826 | 1.1531724 |
| ceftizoxime   | NAUSEA                            | 2.66971   | 3.0469917 | 1.3097996 |
| ceftizoxime   | VOMITING                          | 2.6633319 | 2.8152657 | 1.3047251 |
| cefbuperazone | OEDEMA GENERALISED                | 2.6597    | 2.666262  | 1.2319225 |
| cefaclor      | TEMPERATURE CHANGED SENSATION     | 2.6544743 | 2.6630879 | 1.0365328 |
| cefazolin     | INJECTION SITE REACTION           | 2.6543618 | 2.6589319 | 1.0977636 |
| cefditoren    | SINUSITIS                         | 2.6488889 | 2.6547725 | 1.2206819 |
| ceftizoxime   | PRURITUS                          | 2.6479883 | 2.9352575 | 1.2989516 |
| ceftezole     | DIZZINESS                         | 2.6458279 | 2.723507  | 1.3172265 |
| ceftriaxone   | FLUSHING                          | 2.6400844 | 2.6447111 | 0.8028461 |
| cefepime      | AGranulocytosis                   | 2.6267278 | 2.6565331 | 1.1522874 |
| cefuroxime    | CONJUNCTIVITIS                    | 2.6014681 | 2.6071379 | 1.199192  |
| cefmetazole   | PALPITATION                       | 2.5892828 | 2.6023731 | 1.2467079 |
| cefpodoxime   | FACE OEDEMA                       | 2.5723439 | 2.578694  | 1.184583  |
| cefotetan     | ANAPHYLACTIC REACTION             | 2.5693807 | 2.5780775 | 1.0949531 |

|                                                     |                                      |           |           |           |
|-----------------------------------------------------|--------------------------------------|-----------|-----------|-----------|
| cefalexin                                           | SOMNOLENCE                           | 2.5630936 | 2.5711739 | 1.1978947 |
| cefbuperazone                                       | URTICARIA                            | 2.5623161 | 2.7383517 | 1.2526849 |
| cefazedone                                          | ANAPHYLACTIC SHOCK                   | 2.5576366 | 2.5596238 | 0.9661533 |
| ceftezole                                           | ALLERGY                              | 2.5557669 | 2.5792814 | 1.2537554 |
| cefoperazone<br>and beta-<br>lactamase<br>inhibitor | INJECTION SITE RASH                  | 2.5480114 | 2.5528844 | 1.1635618 |
| cefaclor                                            | URTICARIA                            | 2.5437282 | 2.7162666 | 1.0059244 |
| cefotiam                                            | DIZZINESS                            | 2.5423124 | 2.6121291 | 1.196729  |
| cefotaxime                                          | DIARRHOEA                            | 2.5409712 | 2.8081213 | 1.0979947 |
| cefotetan                                           | OEDEMA PERIORBITAL                   | 2.5343437 | 2.5386606 | 1.0668001 |
| cefazedone                                          | SWEATING INCREASED                   | 2.5310638 | 2.5435522 | 0.985682  |
| cefixime                                            | DYSPEPSIA                            | 2.5290828 | 2.5701872 | 1.2517243 |
| cefotetan                                           | TEMPERATURE CHANGED<br>SENSATION     | 2.5163696 | 2.5238515 | 1.0713643 |
| cefoperazone<br>and beta-<br>lactamase<br>inhibitor | SWEATING INCREASED                   | 2.5087923 | 2.52099   | 1.2046906 |
| cefoxitin                                           | URTICARIA                            | 2.508302  | 2.6742747 | 1.250897  |
| cefadroxil                                          | OEDEMA                               | 2.4946751 | 2.5062707 | 1.1861944 |
| cefmetazole                                         | VOMITING                             | 2.4931992 | 2.6201392 | 1.2379558 |
| cefazolin                                           | VOMITING                             | 2.4866379 | 2.6126593 | 1.0566437 |
| cefcapene                                           | UPPER RESPIRATORY TRACT<br>INFECTION | 2.4846995 | 2.4982998 | 1.1953845 |
| cefprozil                                           | DYSPEPSIA                            | 2.4802325 | 2.5192349 | 1.2392528 |
| cefradine                                           | ABDOMINAL PAIN                       | 2.472035  | 2.5211029 | 1.2380438 |
| cefditoren                                          | FACE OEDEMA                          | 2.4633104 | 2.4689686 | 1.1408785 |
| cefditoren                                          | CELLULITIS                           | 2.4534414 | 2.458194  | 1.1245934 |
| cefotetan                                           | INJECTION SITE PAIN                  | 2.4499563 | 2.4565238 | 1.0418615 |
| cefazolin                                           | SKIN DISCOLOURATION                  | 2.4448069 | 2.4485313 | 1.0132355 |
| cefditoren                                          | FATIGUE                              | 2.4417024 | 2.4472771 | 1.1304018 |
| ceftriaxone                                         | OEDEMA MOUTH                         | 2.4281713 | 2.4292759 | 0.7329469 |
| cefradine                                           | DYSPNOEA                             | 2.4274304 | 2.4775589 | 1.2145793 |
| cefazolin                                           | DIZZINESS                            | 2.4204071 | 2.4814896 | 1.0274559 |
| cefetamet                                           | ABDOMINAL PAIN                       | 2.4199922 | 2.4662963 | 1.163943  |
| cefradine                                           | RASH ERYTHEMATOUS                    | 2.4175567 | 2.4302845 | 1.1674334 |
| cefminox                                            | PRURITUS                             | 2.414488  | 2.6359087 | 1.2315379 |
| cefotiam                                            | NAUSEA                               | 2.4141445 | 2.6969733 | 1.1367053 |
| cefotetan                                           | MALAISE                              | 2.4136607 | 2.4196351 | 1.0249321 |
| cefazolin                                           | SWEATING INCREASED                   | 2.4130562 | 2.4240405 | 1.0170894 |
| ceftriaxone                                         | URTICARIA                            | 2.4036515 | 2.5509879 | 0.7449832 |

|                                                     |                            |           |           |           |
|-----------------------------------------------------|----------------------------|-----------|-----------|-----------|
| cefixime                                            | ANGIOEDEMA                 | 2.3921019 | 2.4022674 | 1.1437549 |
| cefazedone                                          | INJECTION SITE PAIN        | 2.3884095 | 2.3945396 | 0.9272475 |
| ceftriaxone                                         | ANAPHYLACTIC SHOCK         | 2.3580241 | 2.3596213 | 0.7194315 |
| cefaclor                                            | CONJUNCTIVITIS             | 2.3502724 | 2.3545898 | 0.9173933 |
| cefbuperazone                                       | PRURITUS                   | 2.3483997 | 2.5528218 | 1.141374  |
| cefpiramide                                         | CHEST PAIN                 | 2.3472733 | 2.369244  | 1.1539549 |
| cefpodoxime                                         | SOMNOLENCE                 | 2.3387632 | 2.3450753 | 1.0785865 |
| cefadroxil                                          | PHARYNGITIS                | 2.3325474 | 2.3533847 | 1.1440379 |
| cefpodoxime                                         | DYSPEPSIA                  | 2.3316165 | 2.3645487 | 1.1057243 |
| flomoxef                                            | FLUSHING                   | 2.3246799 | 2.3279693 | 1.0299539 |
| cefalexin                                           | ABDOMINAL PAIN             | 2.3208877 | 2.3621412 | 1.1535452 |
| cefbuperazone                                       | ANGIOEDEMA                 | 2.3205145 | 2.3298666 | 1.0946319 |
| cefixime                                            | URINARY TRACT<br>INFECTION | 2.2976768 | 2.3039788 | 1.0715006 |
| cefpiramide                                         | DIZZINESS                  | 2.2876176 | 2.3398287 | 1.1379057 |
| cefoperazone<br>and beta-<br>lactamase<br>inhibitor | PAIN                       | 2.2718608 | 2.2767577 | 1.0440942 |
| cefroxadine                                         | DIZZINESS                  | 2.2694963 | 2.3205485 | 1.1343404 |
| cefbuperazone                                       | HYPOTENSION                | 2.2670306 | 2.2887822 | 1.0840183 |
| cefetamet                                           | DIZZINESS                  | 2.2657802 | 2.3165962 | 1.0962293 |
| cefazolin                                           | MALAISE                    | 2.2646341 | 2.2696474 | 0.9426333 |
| ceftazidime                                         | RASH ERYTHEMATOUS          | 2.2634172 | 2.2740316 | 1.0573373 |
| cefotaxime                                          | ANGIOEDEMA                 | 2.2537613 | 2.2623834 | 0.958385  |
| cefoxitin                                           | CHEST PAIN                 | 2.2532115 | 2.2728165 | 1.0909845 |
| ceftriaxone                                         | MALAISE                    | 2.2339176 | 2.2387425 | 0.6897691 |
| cefbuperazone                                       | ANAPHYLACTIC REACTION      | 2.2294905 | 2.2353982 | 1.0308926 |
| ceftizoxime                                         | DIZZINESS                  | 2.2255934 | 2.273889  | 1.0701211 |
| cefaclor                                            | NERVOUSNESS                | 2.2146797 | 2.2161333 | 0.8406606 |
| cefadroxil                                          | RHINITIS                   | 2.2116401 | 2.2238884 | 1.0536153 |
| cefazedone                                          | URTICARIA                  | 2.2051556 | 2.3202127 | 0.8594205 |
| cefotetan                                           | DIZZINESS                  | 2.1999409 | 2.2466594 | 0.9395815 |
| cefaclor                                            | PARAESTHESIA               | 2.1942765 | 2.2015368 | 0.8571122 |
| cefaclor                                            | GASTROENTERITIS            | 2.1906071 | 2.1922697 | 0.8347329 |
| cefamandole                                         | PRURITUS                   | 2.1843435 | 2.3496007 | 1.0883304 |
| flomoxef                                            | VOMITING                   | 2.1788116 | 2.2654593 | 1.0032954 |
| cefotiam                                            | PARAESTHESIA               | 2.1785719 | 2.1856851 | 0.9886384 |
| ceftriaxone                                         | ALLERGY                    | 2.1755492 | 2.1906397 | 0.6730122 |
| cefodizime                                          | NAUSEA                     | 2.1711792 | 2.3776843 | 1.095901  |
| cefmetazole                                         | ALLERGY                    | 2.1671475 | 2.1820716 | 1.0341314 |
| cefotetan                                           | FLUSHING                   | 2.1628907 | 2.1655769 | 0.8952949 |

|               |                                |           |           |           |
|---------------|--------------------------------|-----------|-----------|-----------|
| cefoxitin     | RASH                           | 2.1625959 | 2.4792426 | 1.0556383 |
| ceftriaxone   | VOMITING                       | 2.1562076 | 2.240248  | 0.6673234 |
| cefodizime    | DIZZINESS                      | 2.1369876 | 2.1799404 | 1.0395816 |
| cefotetan     | PRURITUS                       | 2.127072  | 2.2796562 | 0.903408  |
| cefdinir      | RHINITIS                       | 2.1260769 | 2.1370156 | 1.0067373 |
| ceftizoxime   | URTICARIA                      | 2.1104174 | 2.2114608 | 1.0041839 |
| ceftezole     | NAUSEA                         | 2.1042402 | 2.2919194 | 1.0192344 |
| ceftazidime   | PARAESTHESIA                   | 2.1010224 | 2.1074296 | 0.956737  |
| ceftriaxone   | ANGIOEDEMA                     | 2.0809095 | 2.0877692 | 0.6392218 |
| cefpodoxime   | SPUTUM DISORDER                | 2.0797444 | 2.0838618 | 0.9294137 |
| cefazolin     | OEDEMA PERIORBITAL             | 2.0737202 | 2.0761908 | 0.8394516 |
| cefaclor      | INJECTION SITE<br>INFLAMMATION | 2.0720678 | 2.073422  | 0.7788853 |
| cefixime      | COUGHING                       | 2.0677731 | 2.0852561 | 0.9801445 |
| cefaclor      | DIZZINESS                      | 2.0542609 | 2.0924908 | 0.7966036 |
| cefmetazole   | HEADACHE                       | 2.0503485 | 2.0730609 | 0.9702403 |
| cefotetan     | ANGIOEDEMA                     | 2.0499584 | 2.0565219 | 0.8531726 |
| cefbuperazone | CIRCULATORY FAILURE            | 2.0464135 | 2.0508475 | 0.920416  |
| flomoxef      | DIZZINESS                      | 2.0461338 | 2.0839135 | 0.9240863 |
| ceftezole     | PARAESTHESIA                   | 2.0458631 | 2.0517887 | 0.9355922 |
| ceftriaxone   | PARAESTHESIA                   | 2.0430804 | 2.0489821 | 0.6252786 |
| cefbuperazone | PARAESTHESIA                   | 2.0429857 | 2.0488866 | 0.928829  |
| ceftazidime   | RIGORS                         | 2.0426428 | 2.0504219 | 0.9274943 |
| cefradine     | URTICARIA                      | 2.0405541 | 2.1318308 | 0.9880684 |
| cefditoren    | MYALGIA                        | 2.039224  | 2.0491717 | 0.9417201 |
| ceftriaxone   | OEDEMA PERIORBITAL             | 2.0384498 | 2.0407985 | 0.6204005 |
| cefditoren    | DYSPEPSIA                      | 2.0324084 | 2.0545939 | 0.9487359 |
| cefazolin     | RASH ERYTHEMATOUS              | 2.0207078 | 2.0283567 | 0.8269484 |
| cefdinir      | URTICARIA                      | 2.0150336 | 2.1028617 | 0.9696648 |
| cefuroxime    | DIZZINESS                      | 2.014548  | 2.0506014 | 0.9449011 |
| cefadroxil    | ABDOMINAL PAIN                 | 2.0057929 | 2.032826  | 0.9586182 |
| cefotaxime    | SKIN DISCOLOURATION            | 2.0056208 | 2.0077464 | 0.8120775 |
| ceftizoxime   | ALLERGY                        | 2.0023427 | 2.0141733 | 0.921412  |
| cefminox      | VOMITING                       | 2.0014665 | 2.0686847 | 0.967829  |
| cefditoren    | CONSTIPATION                   | 2.0008286 | 2.0210993 | 0.9278209 |

---
